# Training neural networks to recognize speech increased their correspondence to the human auditory pathway but did not yield a shared hierarchy of acoustic features

Jessica A.F. Thompson<sup>a,b,c,d,\*</sup>, Yoshua Bengio<sup>b,g</sup>, Elia Formisano<sup>e,f,h,i</sup>, Marc Schönwiesner<sup>j,a,c</sup>

<sup>a</sup>*International Laboratory for Brain, Music & Sound Research (BRAMS), Montreal, Canada*

<sup>b</sup>*Quebec Artificial Intelligence Institute (Mila), Montreal, Canada*

<sup>c</sup>*Centre for Research on Brain, Music & Language, Montreal, Canada*

<sup>d</sup>*Département de psychologie, Université de Montréal, Montreal, Canada*

<sup>e</sup>*Department of Cognitive Neuroscience, Faculty of Psychology and Neuroscience, Maastricht University, Maastricht, The Netherlands*

<sup>f</sup>*Maastricht Brain Imaging Centre, Maastricht, The Netherlands*

<sup>g</sup>*Département d'informatique et de recherche opérationnelle, Université de Montréal, Montreal, Canada*

<sup>h</sup>*Maastricht Centre for Systems Biology, Maastricht, The Netherlands*

<sup>i</sup>*Brightlands Institute for Smart Society, Heerlen, The Netherlands*

<sup>j</sup>*Institut für Biologie, University of Leipzig, Germany*

---

## Abstract

The correspondence between the activity of artificial neurons in convolutional neural networks (CNNs) trained to recognize objects in images and neural activity collected throughout the primate visual system has been well documented. Shallower layers of CNNs are typically more similar to early visual areas and deeper layers tend to be more similar to later visual areas, providing evidence for a shared representational hierarchy. This phenomenon has not been thoroughly studied in the auditory domain. Here, we compared the representations of CNNs trained to recognize speech (triphone

---

\*Corresponding author (j.thompson@umontreal.ca)

recognition) to 7-Tesla fMRI activity collected throughout the human auditory pathway, including subcortical and cortical regions, while participants listened to speech. We found no evidence for a shared representational hierarchy of acoustic speech features. Instead, all auditory regions of interest were most similar to a single layer of the CNNs: the first fully-connected layer. This layer sits at the boundary between the relatively task-general intermediate layers and the highly task-specific final layers. This suggests that alternative architectural designs and/or training objectives may be needed to achieve fine-grained layer-wise correspondence with the human auditory pathway.

*Keywords:* CNNs, similarity analysis, 7T fMRI, subcortical, speech, auditory cortex

---

## Highlights

- Trained CNNs more similar to auditory fMRI activity than untrained
- No evidence of a shared representational hierarchy for acoustic features
- All ROIs were most similar to the first fully-connected layer
- CNN performance on speech recognition task positively associated with fmri similarity

## 1. Introduction

2 The use of deep neural networks (DNNs) as models of biological neural  
3 networks has been discussed as an opportunity for synergy between neuro-  
4 science and artificial intelligence (Barrett et al., 2019, Marblestone et al.,

5 2016, Richards et al., 2019). The paradigm of comparing DNN activity to  
6 neural activity has been most thoroughly explored in research on the pri-  
7 mate visual system. Seminal work by DiCarlo & Cox proposed that visual  
8 object recognition is accomplished via successive layers of nonlinear trans-  
9 formations that effectively *untangle* visual inputs, linearizing the boundaries  
10 between object manifolds (DiCarlo and Cox, 2007). Similar language has  
11 been used to describe how DNNs accomplish recognition tasks (Bengio et al.,  
12 2013). Several studies have now reported that state-of-the-art (SOTA) ma-  
13 chine learning systems, trained only to maximize their performance on a  
14 specific task, without any explicit goal to mimic neural activity, appear to  
15 learn representations that are similar to those found in the brains of animals  
16 engaged in a similar task (Kriegeskorte, 2015). For example, the output layer  
17 of Alexnet (Krizhevsky and Hinton, 2012) has been found to be highly pre-  
18 dictive of spiking responses to natural images in inferior temporal cortex and  
19 intermediate layers to be highly predictive of V4 responses (Cadieu et al.,  
20 2014, Yamins et al., 2014). Similar comparisons have been made between  
21 modern convnets and the human visual system as recorded with functional  
22 magnetic resonance imaging (fMRI) (Khaligh-Razavi and Kriegeskorte, 2014,  
23 Agrawal et al., 2014, Eickenberg et al., 2017, Güçlü and van Gerven, 2016).  
24 The most convincing demonstration that modern convnets learn representa-  
25 tions that are meaningful to neurons in the primate visual system is work  
26 from Bashivan et al. (2019) showing that task-optimized DNNs can be used  
27 to control the activity of macaque V4 neurons. They found that stimuli syn-  
28 thesized to maximally activate specific units in the DNN also drove activity  
29 of matched sites in V4 well beyond their maximum firing rate in response to

30 natural images.

31 Comparisons of DNNs to biological sensory pathways often come with  
32 claims of shared representation hierarchy. Regions of interest (ROIs) along  
33 some pathway are mapped to layers of a DNN based on their similarity. Early  
34 layers in the network tend to be more similar to early ROIs in the pathway  
35 and late layers to late ROIs (Cichy et al., 2016, Güçlü and van Gerven, 2015).  
36 These results suggest that DNNs are not just learning representations that  
37 are similar to single regions, but rather that they constitute models of an  
38 entire hierarchy of sensory processing. However, not all studies have found  
39 evidence of shared hierarchy. Cadena et al. (2019) compared representations  
40 at several layers of a convnet trained on ImageNet to neural activation in the  
41 mouse visual cortex. While they found their network outperformed classical  
42 predictive models, they found no evidence for a shared hierarchy and no  
43 benefit over a random network whose weights had never been trained. The  
44 authors suggest that networks trained on more ethologically valid tasks may  
45 be required to capture the functional organization of the rodent visual cortex.

46 Relatively few experiments have compared DNNs trained on acoustic  
47 tasks to biological auditory systems. Kell et al. (2018) trained convnets  
48 on speech and music tasks and compared their learned representations to  
49 fMRI responses in human auditory cortex. They found that intermediate  
50 DNN representations explained more variance in auditory cortex responses  
51 than a spectrotemporal modulation-based baseline model. To assess the exist-  
52 tence of a shared hierarchy, they looked only at voxels that showed a reliable  
53 response to sound and layers of their network which were predictive of voxel  
54 activity across auditory cortex. They found that the most predictive layers

55 of primary auditory cortex were intermediate layers, while the most predic-  
56 tive layers of secondary auditory cortex were deeper layers. From this, they  
57 conclude that the hierarchical distinction between primary and secondary  
58 auditory cortex is mirrored in their convnet (Kell et al., 2018). Güçlü et al.  
59 also reported evidence for a shared hierarchy in human auditory cortex, but  
60 they only analyzed the superior temporal gyrus (STG). They used represen-  
61 tational similarity analysis (RSA) to compare representations learned in a  
62 DNN trained to predict tags from excerpts of musical audio.<sup>1</sup> They found a  
63 gradient of complexity across STG where anterior voxel clusters were more  
64 similar to early layers while posterior voxel clusters were more similar to late  
65 layers (Güçlü et al., 2016). While both of the above studies report evidence  
66 for a shared hierarchy between human auditory cortex and DNNs trained on  
67 sound, they report different spatial patterns of similarity gradients.

68 Several different analysis tools are used to compare representations. The  
69 ultimate goal of these analyses is to quantify the similarity of two represen-  
70 tations, but similarity is an ambiguous term that must be defined by the  
71 experimenter. In many of the aforementioned studies, an encoding analysis  
72 is performed where firing rate or voxel activity is predicted by a regularized  
73 linear model of the neural network activity. According to this approach, a  
74 representation is similar to another to the extent that it can be linearly pre-  
75 dicted from the other. There are other notions of representational similarity  
76 that have been explored to study DNNs. Singular value canonical correla-  
77 tion analysis (SVCCA) and projection-weighted canonical correlation anal-

---

<sup>1</sup>Tags are descriptive text annotations like genre or instrumentation labels.

78 ysis (pwCCA) have been used to characterize how network representations  
79 change over training, to compare representations in different architectures,  
80 and to understand the difference between networks that memorize and net-  
81 works that generalize (Raghu et al., 2017, Morcos et al., 2018). Kornblith et  
82 al. recently proposed that, given two networks of identical architecture and  
83 training, differing only in their random initialization, a meaningful notion  
84 of similarity should find their corresponding layers to be most similar (i.e.  
85 layer 1 in network A should be most similar to layer 1 in network B). Of  
86 the tested metrics, which included SVCCA, pwCCA and linear regression,  
87 Centered Kernel Alignment (CKA) was the only method which found that  
88 corresponding layers were most similar to each other, achieving an accuracy  
89 of 99.3% on the layer identification task. The next best metric, linear re-  
90 gression, achieved only 45.4%. This result may be related to the fact that  
91 CKA is only invariant to orthogonal transformations and isotropic scaling,  
92 unlike canonical correlation analysis (CCA), which is invariant to any linear  
93 invertible transformation, and linear regression, which is invariant to any  
94 linear invertible transformation of the predicted variables (Kornblith et al.,  
95 2019). Representational similarity analysis (RSA) (Kriegeskorte et al., 2008),  
96 commonly employed in fMRI analysis, is similar to CKA with a linear ker-  
97 nel except that CKA is based on dot-product similarity and RSA typically  
98 uses correlation-based metrics. CKA provides a general framework with in-  
99 terpretable units, proven convergence rates, and the option to use different  
100 kernels.

101 Here, we use CKA to quantify the similarity between representations  
102 learned in convnets trained on speech and activity throughout the human

103 auditory pathway during speech listening, as measured with 7-Tesla (7T)  
104 fMRI. The high spatial resolution of 7T fMRI allows us to simultaneously  
105 measure activity from auditory cortex as well as subcortical auditory regions,  
106 which are often omitted from auditory fMRI analyses due to their small size.  
107 Since significant auditory processing occurs in brainstem and midbrain re-  
108 gions, this provides us with several distinct regions with a relatively known  
109 connectivity structure with which to compare the convnet representations.  
110 To the best of our knowledge, ours is the first study to compare DNN repre-  
111 sentations to activity throughout the human subcortical and cortical auditory  
112 pathway. If there exists a shared hierarchy between the convnets and the hu-  
113 man auditory pathway, the pattern of similarity should at least distinguish  
114 between cortical and subcortical regions. We visualized the results of the  
115 similarity analysis as similarity matrices with network layers as the rows and  
116 auditory ROIs as the columns. Evidence of a shared hierarchy would man-  
117 ifest as a diagonal pattern in one such similarity matrix, where shallower  
118 layers are more similar to early regions and deeper layers more similar to  
119 later regions. While we found that our trained networks were more similar  
120 to the brain than an untrained network, we found no such diagonal pattern.  
121 Instead we found that, on average, nearly all ROIs are most similar to the  
122 first fully-connected layer.

## 123 **2. Material and methods**

### 124 *2.1. Participants*

125 Six healthy participants (aged 28–31, three women, three men) with nor-  
126 mal hearing and no known neurological disorders were recruited to partici-

127 pate. All participants provided written informed consent prior to the first  
128 MRI session. All participants also consented to their data being made pub-  
129 licly available.<sup>2</sup> The native languages of the participants were English (one  
130 subject), German (three participants) and Dutch (two participants).

### 131 *2.2. Experimental Stimuli*

132 To facilitate comparison with the convnets, we selected utterances from  
133 the same corpus that the networks were trained on. Such a comparison is  
134 complicated by the fact that, although the networks were only trained on  
135 phonetic labels, human listeners will perceive the meaning and higher-level  
136 structure of speech, even if not instructed to do so. Therefore, to make the  
137 experimental conditions as similar as possible for both human and network  
138 listeners, we transformed the natural speech to remove higher-level structure  
139 while preserving the original phonemes. This quilting procedure, described  
140 below, allowed us to focus our comparison on representational transforma-  
141 tions only up to the sub-word level in both the convnets and the human  
142 auditory system.

143 The audio corpora from which the stimuli were constructed were the  
144 same datasets that were used in (Thompson et al., 2019a) and (Thompson  
145 et al., 2019b), which are owned by Nuance Communications. Each of the  
146 three datasets, one for English, Dutch and German, contained 64–83 hours  
147 of spoken text read by several native speakers in a quiet room. The datasets  
148 also included phonetic transcriptions established in a forced alignment with  
149 text transcriptions.

---

<sup>2</sup>MRI data will be made available on [openneuro.org](https://openneuro.org) at publication time.



150 The quilting procedure, adapted from (Overath et al., 2015), chops a  
151 sound file into small segments and reorders the segments according to a  
152 heuristic designed to hide the *seams* of the quilt (the segment boundaries).<sup>3</sup>  
153 A random segment is chosen as the first segment in the quilt. Subsequent seg-  
154 ments are chosen to best match the segment-to-segment boundaries in the  
155 chochleogram of the original audio. In this way, temporal patterns longer  
156 than the segment length are destroyed while minimizing the artefacts intro-  
157 duced by reordering the segments.

158 Instead of using fixed segment lengths, as in (Overath et al., 2015), we  
159 used the provided phonetic boundaries to divide the speech into variable  
160 length segments containing single phonemes. The resulting quilts are out-  
161 of-order sequences of phonemes, preserving phonetic information while de-  
162 stroying the words and semantic content of the speech. The larger the input  
163 corpus relative to the desired quilt length, the more effectively the seams of  
164 the quilt will be hidden. Therefore, we selected the 60 speakers (30 women  
165 and 30 men) with the longest set of utterances in each language. Given all the  
166 utterances from a single speaker as input, the quilting procedure generated  
167 a one-minute quilt. The experimental stimuli consisted of 180 one-minute  
168 speech quilts (60 per English, Dutch and German). The final stimuli were  
169 filtered to account for the frequency response profile of the foam-tip ear-  
170 phones over which the stimuli were presented in the scanner.

---

<sup>3</sup>Original sound quilting code can be found here:  
<http://mcdermottlab.mit.edu/downloads.html>.

171 *2.3. Experimental Protocol*

172 The experimental procedures were approved by the ethics committee of  
173 the Faculty for Psychology and Neuroscience at Maastricht University (ap-  
174 proval code ERCPN-167\_09\_05\_2016). Magnetic resonance images were col-  
175 lected over two sessions on separate days, each consisting of 10 functional  
176 runs. Nine speech quilts were presented in each run, grouped into blocks  
177 of three quilts from the same language. Within a block, the quilts were  
178 presented one after another with no interruption. Blocks were separated by  
179 short periods of rest which were sometimes followed by a question asking  
180 participants to identify the language of the speech presented in the preced-  
181 ing block. The purpose of this question was to ensure that participants were  
182 awake and paying attention to the stimuli. Participants used a button box  
183 to indicate their response. To save time, this vigilance question was not  
184 asked after every block. However, the design was such that the participants  
185 could not easily predict whether they would be questioned and so had to  
186 pay attention during every block. Each run contained one block for each  
187 language. The stimuli were presented in a different pseudo-random order for  
188 each participant.

189 *2.4. MRI Acquisition Parameters*

190 Images were acquired at Maastricht University, Maastricht, Netherlands  
191 on a 7T Siemens MAGNETOM scanner (Siemens Medical Solutions, Erlan-  
192 gen, Germany), with 70 mT/m gradients and a head RF coil (Nova Medical,  
193 Wilmington, MA, USA; single transmit, 32 receive channels). Foam pads  
194 were used to minimize head motion.

195 *2.4.1. Anatomical*

196 At the start of each session, a T1-weighted (T1w) image and a proton  
197 density weighted (PDw) image were acquired using a 3D MPRAGE se-  
198 quence [voxel size=1.0mm isotropic; repetition time (TR)=2370 ms; echo  
199 time (TE)=2.31 ms; flip angle=5°; generalized auto-calibrating partially  
200 parallel acquisitions (GRAPPA)=3 (Griswold et al., 2002); field of view  
201 (FOV)=256 mm; 256 slices, phase encoding direction: anterior to posterior,  
202 inversion time (TI) for T1w only=1500 ms].

203 *2.4.2. Functional*

204 Functional MRI data were acquired with a 2-D Multi-Band Echo Planar  
205 Imaging (2D-MBEPI) sequence (Steen Moeller et al., 2010, Setsompop et al.,  
206 2012). In order to include the entire brainstem and thalamus as well as  
207 primary and secondary auditory cortex, slices were arranged in a coronal  
208 oblique orientation (TR=1700 ms; TE=20 ms; flip angle=70°; GRAPPA=3;  
209 Multi-Band factor=2; FOV=206 mm; 1.7 mm isotropic voxels; phase encode  
210 direction inferior to superior).

211 *2.5. MRI Preprocessing*

212 The MRI preprocessing was performed using *fMRIPrep* 1.4.1 (Esteban  
213 et al. 2018a; Esteban et al. 2018b; RRID:SCR\_016216), which is based on  
214 *Nipype* 1.2.0 (Gorgolewski et al. 2011; Gorgolewski et al. 2018; RRID:SCR\_002502).  
215 The following description was prepared by *fMRIPrep*.

216 *2.5.1. Anatomical data preprocessing*

217 T1-weighted (T1w) images were corrected for intensity non-uniformity  
218 (INU) with `N4BiasFieldCorrection` (Tustison et al., 2010), distributed with

219 ANTs 2.2.0 (Avants et al., 2008, RRID:SCR\_004757). The T1w-reference was  
220 then skull-stripped with a *Nipype* implementation of the `antsBrainExtraction.sh`  
221 workflow (from ANTs), using OASIS30ANTs as target template. Brain tis-  
222 sue segmentation of cerebrospinal fluid (CSF), white-matter (WM) and gray-  
223 matter (GM) was performed on the brain-extracted T1w using `fast` (FSL  
224 5.0.9, RRID:SCR\_002823, Zhang et al., 2001). A T1w-reference map was  
225 computed after registration of 2 T1w images (after INU-correction) using  
226 `mri_robust_template` (FreeSurfer 6.0.1, Reuter et al., 2010). Brain surfaces  
227 were reconstructed using `recon-all` (FreeSurfer 6.0.1, RRID:SCR\_001847,  
228 Dale et al., 1999), and the brain mask estimated previously was refined with  
229 a custom variation of the method to reconcile ANTs-derived and FreeSurfer-  
230 derived segmentations of the cortical gray-matter of Mindboggle (RRID:SCR\_002438,  
231 Klein et al., 2017). Volume-based spatial normalization to one standard  
232 space (MNI152NLin2009cAsym) was performed through nonlinear registra-  
233 tion with `antsRegistration` (ANTs 2.2.0), using brain-extracted versions  
234 of both T1w reference and the T1w template. The following template was  
235 selected for spatial normalization: *ICBM 152 Nonlinear Asymmetrical tem-*  
236 *plate version 2009c* (Fonov et al. 2009, RRID:SCR\_008796; TemplateFlow  
237 ID: MNI152NLin2009cAsym).

### 238 *2.5.2. Functional data preprocessing*

239 For each of the 20 BOLD runs per subject (across all sessions), the  
240 following preprocessing was performed. First, a reference volume and its  
241 skull-stripped version were generated using a custom methodology of *fM-*  
242 *RIPrep*. The BOLD reference was then co-registered to the T1w reference  
243 using `bbregister` (FreeSurfer) which implements boundary-based registra-

244 tion (Greve and Fischl, 2009). Co-registration was configured with nine  
245 degrees of freedom to account for distortions remaining in the BOLD ref-  
246 erence. Head-motion parameters with respect to the BOLD reference (trans-  
247 formation matrices, and six corresponding rotation and translation parame-  
248 ters) are estimated before any spatiotemporal filtering using `mcfliirt` (FSL  
249 5.0.9, Jenkinson et al., 2002). BOLD runs were slice-time corrected using  
250 `3dTshift` from AFNI 20160207 (Cox and Hyde, 1997, RRID:SCR\_005927).  
251 The BOLD time-series, were resampled to surfaces on the following spaces:  
252 *fsaverage5*. The BOLD time-series (including slice-timing correction when  
253 applied) were resampled onto their original, native space by applying a sin-  
254 gle, composite transform to correct for head-motion and susceptibility distor-  
255 tions. These resampled BOLD time-series will be referred to as *preprocessed*  
256 *BOLD in original space*, or just *preprocessed BOLD*. The BOLD time-series  
257 were resampled into standard space, generating a *preprocessed BOLD run in*  
258 *['MNI152NLin2009cAsym'] space*. First, a reference volume and its skull-  
259 stripped version were generated using a custom methodology of *fMRIPrep*.  
260 Several confounding time-series were calculated based on the *preprocessed*  
261 *BOLD*: framewise displacement (FD), DVARS and three region-wise global  
262 signals. FD and DVARS are calculated for each functional run, both using  
263 their implementations in *Nipype* (following the definitions by Power et al.,  
264 2014). The three global signals are extracted within the CSF, the WM, and  
265 the whole-brain masks. Additionally, a set of physiological regressors were  
266 extracted to allow for component-based noise correction (*CompCor*, Behzadi  
267 et al., 2007). Principal components are estimated after high-pass filtering the  
268 *preprocessed BOLD* time-series (using a discrete cosine filter with 128s cut-

269 off) for the two *CompCor* variants: temporal (tCompCor) and anatomical  
270 (aCompCor). tCompCor components are then calculated from the top 5%  
271 variable voxels within a mask covering the subcortical regions. This subcorti-  
272 cal mask is obtained by heavily eroding the brain mask, which ensures it does  
273 not include cortical GM regions. For aCompCor, components are calculated  
274 within the intersection of the aforementioned mask and the union of CSF  
275 and WM masks calculated in T1w space, after their projection to the native  
276 space of each functional run (using the inverse BOLD-to-T1w transforma-  
277 tion). Components are also calculated separately within the WM and CSF  
278 masks. For each CompCor decomposition, the  $k$  components with the largest  
279 singular values are retained, such that the retained components' time series  
280 are sufficient to explain 50 percent of variance across the nuisance mask (CSF,  
281 WM, combined, or temporal). The remaining components are dropped from  
282 consideration. The head-motion estimates calculated in the correction step  
283 were also placed within the corresponding confounds file. The confound time  
284 series derived from head motion estimates and global signals were expanded  
285 with the inclusion of temporal derivatives and quadratic terms for each (Sat-  
286 terthwaite et al., 2013). Frames that exceeded a threshold of 0.5 mm FD  
287 or 1.5 standardised DVARS were annotated as motion outliers. All resam-  
288 plings can be performed with *a single interpolation step* by composing all the  
289 pertinent transformations (i.e. head-motion transform matrices, susceptibil-  
290 ity distortion correction when available, and co-registrations to anatomical  
291 and output spaces). Gridded (volumetric) resamplings were performed us-  
292 ing `antsApplyTransforms` (ANTs), configured with Lanczos interpolation to  
293 minimize the smoothing effects of other kernels (Lanczos, 1964). Non-gridded

294 (surface) resamplings were performed using `mri_vol2surf` (FreeSurfer).

## 295 *2.6. Regions of Interest*

296 We extracted blood oxygenation level-dependent (BOLD) signal at spe-  
297 cific regions of interest (ROIs) along the auditory pathway: cochlear nucleus  
298 (CN), superior olivary complex (SOC), inferior colliculus (IC), medial genic-  
299 ulate nucleus (MGN), Heschl's gyrus (HG), planum temporale (PT), planum  
300 polare (PP), superior temporal gyrus anterior portion (STGa), and superior  
301 temporal gyrus posterior portion (STGp). We used the subcortical region  
302 definitions from the atlas recently published by Sitek et al. (2019)<sup>4</sup>. Corti-  
303 cal regions were defined using the Harvard-Oxford parcellation included in  
304 FSL 5.0 and accessed through *nilearn* 0.5.2 (Abraham et al., 2014). ROI  
305 definitions included both left and right hemispheres. A simple General Lin-  
306 ear Model (GLM) sound vs no-sound contrast was calculated using *nistats*  
307 0.0.1b1 to select cortical voxels that respond to sound for subsequent anal-  
308 ysis. Nilearn's `NiftiMasker` was used to extract multi-voxel activity from  
309 each of the ROIs. The masks for the cortical regions took the intersection  
310 with the subject's brain mask, as prepared by *fMRIPrep*, and the map of sig-  
311 nificant ( $p < .05$  uncorrected) voxels in the sound vs no-sound contrast. To  
312 improve the signal-to-noise-ratio (SNR), the `NiftiMasker` detrended, stan-  
313 dardized, and removed confounding variables (as calculated by *fMRIPrep*

---

<sup>4</sup>Due to the small size of CN and SOC and the difficulty of inter-subject alignment of the brainstem, we cannot be completely certain that the activity we extracted truly corresponds to activity in these small brainstem regions. However, the participants in the present study were also participants in the auditory fMRI sessions reported in (Sitek et al., 2019), providing some assurance that these region definitions are reasonable.

314 and described above).

### 315 *2.7. Convolutional Neural Network Activations*

316 The convnets analyzed here are a subset of those analyzed in (Thomp-  
317 son et al., 2019a). All networks were trained to perform context-dependent  
318 phone (triphone) classification. Here we look only at the nine freeze-trained  
319 networks, which outperformed all other models in Thompson et al. (2019a).  
320 These nine networks consisted of three monolingual networks for each of  
321 the three languages (English, Dutch and German) and six transfer networks  
322 which were first trained on one language and then freeze-trained on another.  
323 In all cases, all parameters were updated for 100 epochs and then the net-  
324 works were freeze-trained for an additional 100 epochs. Freeze training refers  
325 to the procedure by which layers are gradually removed from the set of train-  
326 able variables over the course of training and in order of depth. Previous  
327 work has shown that freeze training can speed up training (Raghu et al.,  
328 2017) and facilitate transfer across related tasks (Thompson et al., 2019a).  
329 All networks were of identical architecture and consisted of nine convolu-  
330 tional layers followed by three fully connected layers. The layers were as  
331 follows, where triplets specify the filter size and number of feature maps in  
332 each convolutional layer and the singletons specify how many units in each  
333 fully connected layer: (7, 7, 1024), (3, 3, 256), (3, 3, 256), (3, 3, 128), (3, 3,  
334 128), (3, 3, 128), (3, 3, 64), (3, 3, 64), (3, 3, 64), (600), (190), (9000). The  
335 input data were 45-dimensional mel-frequency filterbank features calculated  
336 at a rate of one frame every 10 ms.

337 For every network, the activation in response to the original (unquilted)  
338 speech stimuli was recorded. For convolutional layers, the average activation



339 within each feature map was recorded. For fully connected layers, the acti-  
340 vation at each unit was recorded. Only the activation in response to every  
341 second frame of the audio features was saved. Subsequently, the network  
342 activations were segmented according to the same phonetic boundaries and  
343 were quilted according to the same segment order that was used when gen-  
344 erating the experimental stimuli. This produced 180 sequences of network  
345 activations for each network, corresponding the 180 speech quilts presented  
346 in the scanner.

### 347 2.8. CKA Similarity Analysis

CKA is a matrix correlation method, similar to representational similar-  
ity analysis (RSA) or canonical correlation analysis (CCA). CKA takes two  
matrices  $X$  and  $Y$  as input: in this case, one for the BOLD responses and  
one for the convnet responses to the same stimuli. CKA can be expressed as  
a normalized version of the Hilbert-Schmidt Independence Criterion (HSIC)  
(Cortes et al., 2012).

$$\text{CKA}(K, L) = \frac{\text{HSIC}(K, L)}{\text{HSIC}(K, K)\text{HSIC}(L, L)} \quad (1)$$

where  $K_{ij} = k(\mathbf{x}_i, \mathbf{x}_j)$  and  $L_{ij} = l(\mathbf{x}_i, \mathbf{x}_j)$  correspond to two kernels. Gretton  
et al. (2005) proved that HSIC converges to the population value at a rate  
of  $1/\sqrt{n}$ . The standard HSIC varies between 0 and 1 where 0 indicates  
independence between  $X$  and  $Y$ . When using a linear kernel, CKA is simply:

$$\text{CKA}(X, Y) = \frac{\|Y^\top X\|_F^2}{\|X^\top X\|_F \|Y^\top Y\|_F} \quad (2)$$

348 which is equivalent to the RV-coefficient (Robert and Escoufier, 1976).

349 Here we calculated CKA with a radial basis function (RBF) kernel and  
350 an unbiased estimator of the dot product similarity. The choice of the RBF  
351 kernel is based on several preliminary network-to-network and brain-to-brain  
352 comparisons where the representational hierarchy is known. As described in  
353 the Supplemental Material, RBF CKA was most sensitive to the represen-  
354 tational similarities of interest. To make CKA less biased, the dot product  
355 similarity in the standard CKA is replaced with the unbiased HSIC, as de-  
356 scribed in Song et al. (2007) and as implemented in the Google colab that  
357 was released with Kornblith et al. (2019). This unbiased RBF CKA metric  
358 varies between -1 and 1.

359 The matrices  $X$  and  $Y$  to be compared must have the same number of  
360 rows, corresponding to time points or observations, but can differ in the num-  
361 ber of columns, corresponding to voxels or units. Since the temporal rate of  
362 fMRI is much slower than that of our acoustic features, temporal rescaling  
363 and alignment is required. The preprocessed BOLD timeseries from each  
364 ROI and each run were upsampled to match the frame rate of the network  
365 activations (one frame every 20 ms) using *pandas* (McKinney, 2010, 2011).  
366 This strategy allowed us to preserve the temporal resolution of the network  
367 activations without need for summary or binning. The quilted network ac-  
368 tivations were then aligned to the corresponding BOLD timeseries, setting  
369 timepoints when no stimulus was presented to zero. Since the timing of the  
370 experimental runs and the stimuli presentation order was different for each  
371 subject, this resulted in one matrix per subject per run for each layer of each  
372 convnet.

373 The Glover model of the hemodynamic response function (HRF) (kernel

length=32 seconds), as implemented in *nistats* 0.0.1b0, was convolved with  
the network activations. We extracted and concatenated only the time seg-  
ments corresponding to the blocks of continuous auditory stimulation from  
both the fMRI and network activity. The first six seconds of each block were  
excluded from the analysis to allow for the HRF to ramp up. Thus, the to-  
be-analyzed fMRI activity does not include the on/off response at the onset  
of the stimulus blocks. Responses to each block were trimmed to exactly  
8599 frames, which, when concatenated, resulted in matrices with 515940  
rows for both the fMRI and neural network activity. CKA similarity was  
then calculated for all ROI-layer pairs

#### 2.8.1. Neural similarity score

To quantify the similarity between a given ROI and network layer, we also calculate the CKA similarity between each ROI and the layers of an untrained network. This untrained network has the same architecture as the trained models, but its parameters have been randomly initialized and never updated. If training has increased the correspondence to the brain, the CKA scores for a trained network should be greater than that of the untrained network. We capture the effect of training on similarity by calculating the difference of standardized CKA scores between a trained network of interest and an untrained network, which we refer to here as the *neural similarity score* for brevity. Within each subject, the CKA scores are standardized using the mean  $\mu_s$  and standard deviation  $\sigma_s^2$  calculated over all models and ROI-layer pairs. The CKA scores of the untrained network are standardized using the same mean and standard deviation. The neural similarity score  $\phi_m^s$  is a difference of  $z$ -scores which reflects the similarity achieved by model  $m$

in subject  $s$  relative to the untrained model.

$$\phi_m^s = \frac{cka_m - \mu_s}{\sigma_s^2} - \frac{cka_{untrained} - \mu_s}{\sigma_s^2} \quad (3)$$

385 Thus a neural similarity score of 1 indicates that the similarity achieved by  
386 the trained model is 1 standard deviation greater than that achieved by the  
387 untrained network. As previous work has shown, it is crucial to compare  
388 trained networks to a random network to verify that the observed similarity  
389 can be attributed to the optimization and is not inherited from the similarity  
390 of the input features and/or architecture alone (Kell et al., 2018, Cadena  
391 et al., 2019).

### 392 **3. Results**

393 We calculated the CKA similarity for each network, subject, and ROI-  
394 layer pair. The results of these analyses can be summarized in similarity  
395 matrices whose rows correspond to layers of a network and whose columns  
396 correspond to the auditory ROIs. Figure 1 shows the grand mean similarity  
397 matrix (left), the mean similarity matrix for the untrained network (middle),  
398 and the mean neural similarity score matrix (right). Training increased net-  
399 work similarity to the auditory ROIs, as evidenced by the fact the the neural  
400 similarity scores for the trained layers are all positive (Figure 1c). However,  
401 we find no evidence of a shared hierarchy, which would manifest itself as  
402 a diagonal pattern of high neural similarity scores where shallow layers are  
403 more similar to early ROIs and deeper layers are more similar to later ROIs.  
404 This hypothesized diagonal pattern also does not occur in the raw CKA sim-  
405 ilarity scores, neither for the trained nor untrained networks (Figure 1a–b).

406 Instead, for all ROIs, the first fully connected layer (fc1) achieves the highest  
 407 raw CKA similarity and the highest neural similarity score. This pattern  
 408 does not occur in the similarity matrix for the untrained network, suggesting  
 409 that it was introduced by training and not by the architecture.

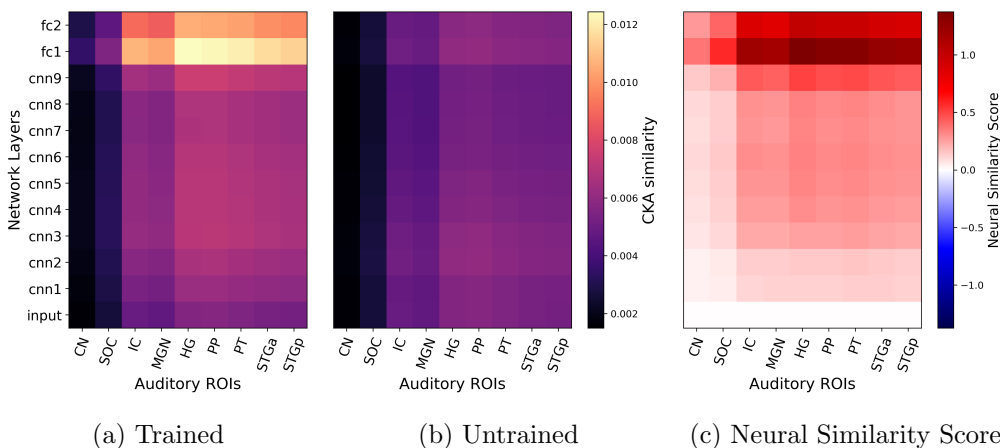

Figure 1: **Grand Average Similarity**. No shared representational hierarchy is observed. **(Left)** Raw CKA similarity averaged over participants and networks. **(Middle)** Raw CKA similarity for the untrained network, averaged over participants. **(Right)** Neural similarity score averaged over participants and networks. The similarity matrix contains no negative values, showing that training increased correspondence, but there is no diagonal pattern to indicate a shared hierarchy. Instead, for all ROIs, the first fully connected layer (fc1) is most similar.

410 We calculated the average neural similarity score matrix for each net-  
 411 work to investigate how the different training curricula would affect the cor-  
 412 respondence. Figure 2 displays nine similarity matrices arranged in a grid.  
 413 The monolingual models, which were only ever trained on one language, are  
 414 along the diagonal of the grid. The off-diagonal matrices correspond to the  
 415 transfer networks which were first trained on one language and subsequently

416 freeze trained on another. The patterns observed in the grand average are  
417 largely replicated in the network-specific similarity matrices. Layer fc1 gen-  
418 erally achieves high neural similarity scores and none of the networks show  
419 any clear evidence for a shared hierarchy. The neural similarity score for  
420 layer fc2 is near or below 0 for the monolingual networks but well above zero  
421 for the transfer networks. Receiving training on two languages rather than  
422 one increased the correspondence between layer fc2 and the auditory ROIs.

423 We hypothesized that the differences between models observed in Figure 2  
424 may be related to the models' accuracy on the phone classification task on  
425 which they were trained. In Figure 3, we plot the peak neural similarity score  
426 as a function of triphone classification accuracy. The lines show the linear  
427 regression fit for each language-subject pair. All slopes are positive, indicat-  
428 ing a positive relationship between model accuracy on the speech recognition  
429 task and the peak similarity with the human auditory pathway.

#### 430 **4. Discussion**

431 Our experimental results clearly demonstrated that training our convnets  
432 on the triphone recognition tasks increased their representational similarity  
433 to the collected auditory fMRI activity. This demonstrates that our experi-  
434 mental design and analysis was sufficiently sensitive to reveal training-related  
435 effects on representational similarity. However, unlike the previous results of  
436 Kell et al. (2018) and Güçlü et al. (2016), this similarity did not manifest in  
437 a pattern of shared hierarchy; shallower layers were not most similar to early  
438 regions and deeper layers were not more similar to later regions. Instead, the  
439 first fully-connected layer, fc1, achieved the highest similarity score across all

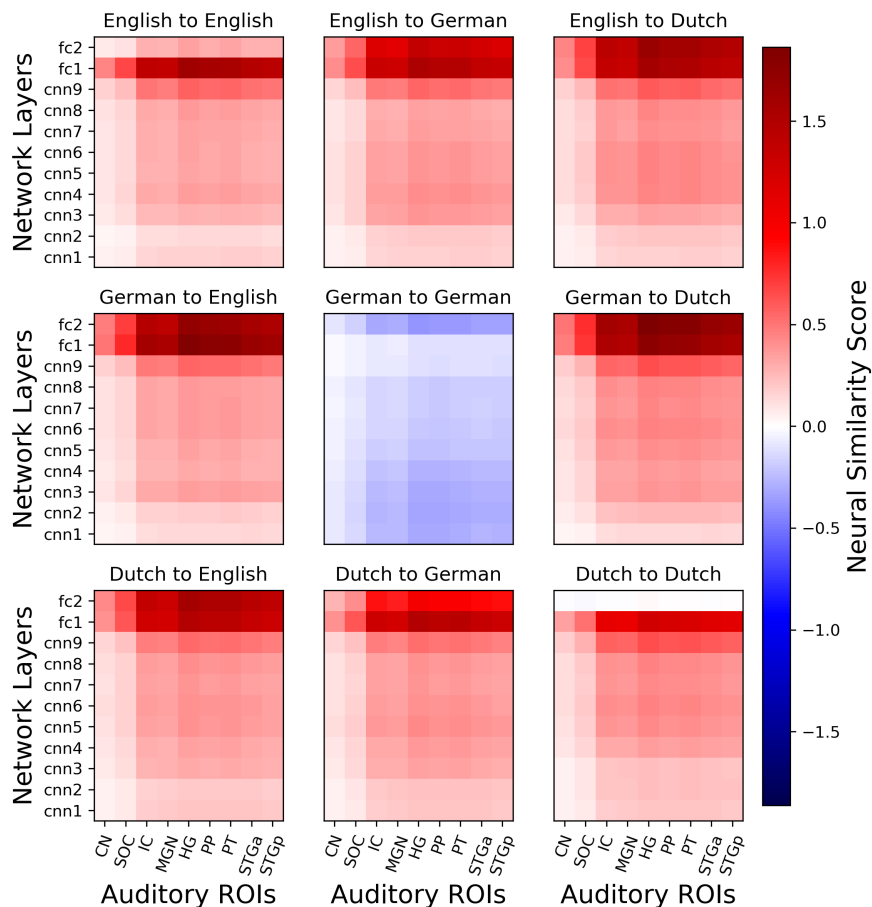

Figure 2: **Average Neural Similarity Score.** Each similarity matrix shows the effect of training on CKA similarity averaged over the six participants. The subtitles of the form “Language 1 to Language 2” indicate that the network was first trained on Language 1 and then freeze trained on Language 2. Training generally increased the correspondence between brain and networks. Layer fc1 shows the highest neural similarity score and there is little evidence for shared hierarchy (no diagonal pattern). In some layers of certain networks, training did not affect or actually reduced the ROI-layer similarity (shown in white and blue). Layer fc2 yields greater neural similarity for the networks that were trained on two languages, which also performed better on the triphone recognition task.

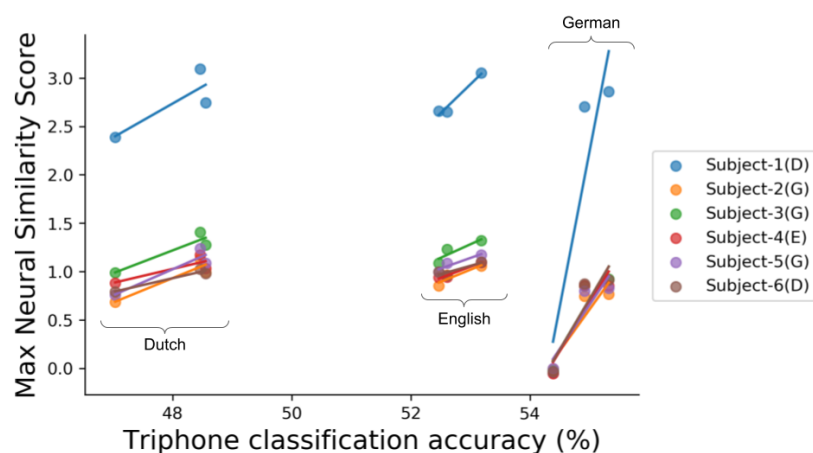

Figure 3: **Peak Neural Similarity Score vs Model Accuracy.** There are nine points per subject for the nine different network models. Lines show the linear regression fit to the three models (one monolingual and two transfer) for each language and subject. Triphone classification accuracy indicates the top-1 test accuracy achieved by each model. For all language-subject pairs, there is a positive relationship between model accuracy and the correspondence to the human brain. However the effect is largest for the German models, owing to the lesser neural similarity score for the German monolingual model. Parenthetical in the legend indicate the native language of each subject. The regression statistics are reported in the Supplemental Information.



440 ROIs, followed by the second fully-connected layer, fc2.

441 This apparent discrepancy may be best explained by reference to the dif-  
442 ferent cost functions employed and stimuli classes presented. In fact, our re-  
443 sults are not inconsistent with previously reports of shared hierarchy. Rather,  
444 our work constitutes a stricter test of the shared hierarchy hypothesis and  
445 our results suggest the limits of such claims. While we focused specifically  
446 on the purely acoustic transformations between spectrogram features and  
447 triphones for exclusively speech stimuli, both Kell et al. (2018) and Güçlü  
448 et al. (2016) trained networks on tasks at a higher level of abstraction such  
449 as word and musical genre recognition and used on a wide variety of natural  
450 sounds, effectively analyzing a broader span of auditory features from low-  
451 level spectral features up to high-level semantic categories. Recall that the  
452 primary evidence of shared representational hierarchy in Kell et al. (2018)  
453 was a relatively coarse grain distinction between primary auditory cortex,  
454 which was better predicted by shallower layers and secondary auditory cor-  
455 tex, which was better predicted by deeper layers. It is possible that we may  
456 have also found a similar distinction had we trained our networks to rec-  
457 ognize words. Future work will need to continue to probe the granularity  
458 of any shared representational hierarchy, for example by testing the shared  
459 hierarchy hypothesis on subsets of network layers.

460 There is a large diversity of experimental design and analysis approaches  
461 employed for the evaluation of representational models. We were inspired by  
462 previous fMRI studies which used continuous acquisition during continuous  
463 stimulation, for example natural movies, as in the studyforrest dataset. It's  
464 been shown that single trial (i.e. without repetition) measurements during

465 movie watching contain sufficient information to train successful decoding  
466 models (Hu et al., 2017) and that functional alignment across subjects based  
467 on such single trial measurements can improve decoding performance rela-  
468 tive to single-subject decoding (Haxby et al., 2011, Bazeille et al., 2020).  
469 Experimental designs of this type sacrifice reliable responses to individual  
470 conditions in favor of maximizing the diversity of stimuli presented (which  
471 aids generalization) and the number of brain volumes collected. Similarity  
472 analyses like CKA benefit from a large number of observations differently  
473 than a classical GLM contrast analysis where a robust, reliable response to a  
474 small number of conditions is most important. In this way, the optimal design  
475 for a similarity analysis may be similar to that of functional alignment. In  
476 order to align two representational spaces, either between two brains or be-  
477 tween model and brain, the stimulus trajectory should maximally explore the  
478 stimulus space of interest. This is why we opted for a continuous stimulation  
479 paradigm and approximately two hours of unique speech stimuli, in contrast  
480 to previous studies which presented a much smaller number of sounds and  
481 analyzed responses averaged over several repetitions. A systematic compari-  
482 son of different experimental design and analysis methods is needed to tease  
483 apart the effect of such choices.

484 We found that all layers were most similar to fc1 on average. Kell et al.  
485 (2018) similarly found that the median variance explained across auditory  
486 cortex was maximal at deep but not the deepest layers. This common  
487 observation may be related to the notion of dimensionality expansion and  
488 compression in DNNs. Recent work describes a two-stage process by which  
489 trained DNNs perform a task. The first stage, which might be call ‘fea-

490 ture extraction', is characterized by increasing intrinsic dimensionality (di-  
491 mensionality expansion) in the early layers of the network. The second,  
492 dimensionality compression, is characterized by decreasing intrinsic dimen-  
493 sionality in the last layers of the network, as the network projects the data  
494 to a low-dimensional manifold from which the target can be linearly decoded  
495 (Recanatesi et al., 2019, Ansuini et al., 2019). Our layer fc1 may be the last  
496 'expansion' layer before the 'compression' of the final layers. From Thompson  
497 et al. (2019a), we know that layer fc1 is at the barrier between the interme-  
498 diate layers which are largely transferable between languages, and the final  
499 layers which are highly task specific. In Thompson et al. (2019b), layer fc1  
500 was the deepest layer to show a high degree a similarity in networks trained  
501 on different languages. The last layers of networks trained on narrowly de-  
502 fined tasks such as triphone recognition may simply learn representations  
503 that are more task-specific than any representations employed by the hu-  
504 man brain, whose ultimate goal during speech listening is typically natural  
505 language understanding, not phoneme recognition. However, fc2 was also  
506 found to be relatively similar, but only for the models which were trained  
507 on two languages rather than one. These networks benefited from twice the  
508 amount of training data as the models trained on only one language and dis-  
509 played superior generalization as a result. Our analysis revealed that these  
510 more generalizable, less language-specific penultimate representations were  
511 also more similar to activity in the auditory brain.

512 Alternative architectures, cost functions, training procedures, or measure-  
513 ment modalities may be required to achieve a layer-to-ROI correspondence for  
514 low-level acoustic speech features. Given the low temporal-resolution of fMRI

515 and the temporal nature of sound, incorporating faster measurements such as  
516 electroencephalography, magnetoencephalography, or electrocorticography  
517 may reveal common patterns that cannot be detected with fMRI. Future  
518 work may want to explore non-convolutional model architectures as there  
519 are a number of reasons why convnets may not be ideal architectures for  
520 audio spectrogram features. Auditory objects display differently in spectro-  
521 grams than visual objects in images. In particular, auditory objects tend to  
522 be less local than visual objects; the part of the spectrogram corresponding  
523 to a particular sound object is often distributed across several frequencies  
524 and time points. Additionally, auditory objects do not occlude each other  
525 as visual objects in images do. Instead, overlapping auditory objects in a  
526 spectrogram will combine additively. In this way, the inductive bias of con-  
527 volutional filters is less appropriate for traditional spectrogram-like features  
528 (Wyse, 2017) and thus perhaps less likely to yield brain-like representations.  
529 Recurrent or autoregressive architectures, which have been very successful in  
530 audio synthesis (Oord et al., 2016), may be ideal candidates to investigate in  
531 future work.

## 532 **Acknowledgments**

533 This work was supported by NWO Vici-Grant 453-12-002 and the Dutch  
534 Province of Limburg, an operating grant from the Canadian Institutes of  
535 Health Research (MOP 201309), the Erasmus Mundus Student Exchange  
536 Network in Auditory Cognitive Neuroscience, a Mitacs-Accelerate intern-  
537 ship, and doctoral scholarships from the Fonds de Recherche du Québec –  
538 Nature et technologies and Natural Sciences and Engineering Research Coun-

539 cil (CREATE). Speech audio was provided by Nuance Communications.

## 540 **References**

541 D. G. Barrett, A. S. Morcos, J. H. Macke, Analyzing biological and artifi-  
542 cial neural networks: challenges with opportunities for synergy?, *Current*  
543 *Opinion in Neurobiology* 55 (2019) 55–64. doi:10.1016/j.conb.2019.01.  
544 007.

545 A. H. Marblestone, G. Wayne, K. P. Kording, Towards an integration of  
546 deep learning and neuroscience, *Frontiers in Computational Neuroscience*  
547 10 (2016) 94. doi:10.3389/fncom.2016.00094.

548 B. A. Richards, T. P. Lillicrap, P. Beaudoin, Y. Bengio, R. Bogacz, A. Chris-  
549 tensen, C. Clopath, R. P. Costa, A. de Berker, S. Ganguli, C. J. Gillon,  
550 D. Hafner, A. Kepecs, N. Kriegeskorte, P. Latham, G. W. Lindsay, K. D.  
551 Miller, R. Naud, C. C. Pack, P. Poirazi, P. Roelfsema, J. Sacramento,  
552 A. Saxe, B. Scellier, A. C. Schapiro, W. Senn, G. Wayne, D. Yamins,  
553 F. Zenke, J. Zylberberg, D. Therien, K. P. Kording, A deep learning  
554 framework for neuroscience, *Nature Neuroscience* 22 (2019) 1761–1770.  
555 doi:10.1038/s41593-019-0520-2.

556 J. J. DiCarlo, D. D. Cox, Untangling invariant object recognition, *Trends in*  
557 *Cognitive Sciences* 11 (2007) 333–341. doi:10.1016/j.tics.2007.06.010.

558 Y. Bengio, A. Courville, P. Vincent, Representation learning: A review and  
559 new perspectives, *IEEE Transactions on Pattern Analysis and Machine*  
560 *Intelligence* 35 (2013) 1798–1828.

- 561 N. Kriegeskorte, Deep neural networks: a new framework for modelling bio-  
562 logical vision and brain information processing, *Annual Review of Vision*  
563 *Science* 1 (2015) 417–446.
- 564 A. Krizhevsky, G. E. Hinton, ImageNet Classification with Deep Convolu-  
565 tional Neural Networks, in: *Advances in Neural Information Processing*  
566 *Systems*, 2012.
- 567 C. Cadieu, H. Hong, D. L. K. Yamins, Deep Neural Networks Rival the  
568 Representation of Primate IT Cortex for Core Visual Object Recognition,  
569 *PLoS Computational Biology* 10 (2014) e1003963. doi:10.1371/journal.  
570 *pcbi.1003963*.
- 571 D. L. K. Yamins, H. Hong, C. F. Cadieu, E. A. Solomon, D. Seibert,  
572 J. J. DiCarlo, Performance-optimized hierarchical models predict neu-  
573 ral responses in higher visual cortex., *Proceedings of the National*  
574 *Academy of Sciences of the United States of America* 111 (2014) 8619–  
575 24. doi:10.1073/pnas.1403112111.
- 576 S.-M. Khaligh-Razavi, N. Kriegeskorte, Deep Supervised, but Not Unsuper-  
577 vised, Models May Explain IT Cortical Representation, *PLoS Computa-*  
578 *tional Biology* 10 (2014) e1003915. doi:10.1371/journal.*pcbi.1003915*.
- 579 P. Agrawal, D. Stansbury, J. Malik, J. L. Gallant, Pixels to Voxels: Modeling  
580 Visual Representation in the Human Brain, *arXiv* (2014) 1407.5104 [q-  
581 *bio.NC*].
- 582 M. Eickenberg, A. Gramfort, G. Varoquaux, B. Thirion, Seeing it all: Convo-

583 lutional network layers map the function of the human visual system, Neu-  
584 roImage 152 (2017) 184–194. doi:10.1016/j.neuroimage.2016.10.001.

585 U. Güçlü, M. A. J. van Gerven, Increasingly complex representations of  
586 natural movies across the dorsal stream are shared between subjects, Neu-  
587 roImage (2016) 6–13. doi:10.1016/j.neuroimage.2015.12.036.

588 P. Bashivan, K. Kar, J. J. DiCarlo, Neural population control via deep image  
589 synthesis, Science 364 (2019). doi:10.1126/science.aav9436.

590 R. M. Cichy, A. Khosla, D. Pantazis, A. Torralba, A. Oliva, Comparison of  
591 deep neural networks to spatio-temporal cortical dynamics of human visual  
592 object recognition reveals hierarchical correspondence, Scientific Reports  
593 6 (2016). doi:10.1038/srep27755.

594 U. Güçlü, M. A. J. van Gerven, Deep Neural Networks Reveal a Gradient in  
595 the Complexity of Neural Representations across the Ventral Stream, The  
596 Journal of Neuroscience 35 (2015) 10005–10014. doi:10.1523/JNEUROSCI.  
597 5023-14.2015.

598 S. A. Cadena, F. H. Sinz, T. Muhammad, E. Froudarakis, E. Cobos, E. Y.  
599 Walke, J. Reimer, M. Bethge, A. S. Tolias, A. S. Ecker, How well do  
600 deep neural networks trained on object recognition characterize the mouse  
601 visual system?, in: Real Neurons & Hidden Units NeurIPS Workshop,  
602 2019.

603 A. J. Kell, D. L. Yamins, E. N. Shook, S. V. Norman-Haignere, J. H. Mc-  
604 Dermott, A Task-Optimized Neural Network Replicates Human Auditory

- 605 Behavior, Predicts Brain Responses, and Reveals a Cortical Processing Hi-  
606 erarchy, *Neuron* 98 (2018) 630–644. doi:10.1016/j.neuron.2018.03.044.
- 607 U. Güçlü, J. Thielen, M. Hanke, M. A. J. van Gerven, Brains on Beats, in:  
608 Advances in Neural Information Processing Systems, 2016, p. 1606.02627.
- 609 M. Raghu, J. Gilmer, J. Yosinski, J. Sohl-Dickstein, SVCCA: Singular Vector  
610 Canonical Correlation Analysis for Deep Understanding and Improvement,  
611 NeurIPS (2017).
- 612 A. S. Morcos, M. Raghu, S. Bengio, Insights on representational similarity  
613 in neural networks with canonical correlation, NeurIPS (2018).
- 614 S. Kornblith, M. Norouzi, H. Lee, G. Hinton, Similarity of Neural Network  
615 Representations Revisited, ICLR workshop on Debugging Machine Learn-  
616 ing Models (2019).
- 617 N. Kriegeskorte, M. Mur, P. Bandettini, Representational similarity analysis  
618 - connecting the branches of systems neuroscience., *Front. in Systems*  
619 *Neuroscience* 2 (2008).
- 620 J. A. F. Thompson, M. Schönwiesner, Y. Bengio, D. Willett, How transfer-  
621 able are features in convolutional neural network acoustic models across  
622 languages?, *Proceedings of the IEEE International Conference on Audio,*  
623 *Speech and Signal Processing (ICASSP)* (2019a).
- 624 J. A. F. Thompson, Yoshua Bengio, M. Schönwiesner, The effect of task and  
625 training on intermediate representations in convolutional neural networks  
626 revealed with modified RV similarity analysis, in: *Cognitive Computa-*  
627 *tional Neuroscience*, 2019b.



- 628 T. Overath, J. H. McDermott, J. M. Zarate, D. Poeppel, The cortical analysis  
629 of speech-specific temporal structure revealed by responses to sound quilts,  
630 Nature Neuroscience 18 (2015) 903–911. doi:10.1038/nn.4021.
- 631 M. A. Griswold, P. M. Jakob, R. M. Heidemann, M. Nittka, V. Jellus,  
632 J. Wang, B. Kiefer, A. Haase, Generalized Autocalibrating Partially Par-  
633 allel Acquisitions (GRAPPA), Magnetic Resonance in Medicine 47 (2002)  
634 1202–1210. doi:10.1002/mrm.10171.
- 635 Steen Moeller, E. Yacoub, C. A. Olman, E. Auerbach, J. Strupp, N. Harel,  
636 K. Ugurbil, Multiband Multislice GE-EPI at 7 Tesla, With 16-Fold Accel-  
637 eration Using Partial Parallel Imaging With Application to High Spatial  
638 and Temporal Whole-Brain fMRI, Magnetic Resonance in Medicine 63  
639 (2010). doi:10.1161/CIRCULATIONAHA.110.956839.
- 640 K. Setsompop, B. A. Gagoski, J. R. Polimeni, T. Witzel, V. J. Wedeen, L. L.  
641 Wald, Blipped-controlled aliasing in parallel imaging for simultaneous  
642 multislice echo planar imaging with reduced g-factor penalty, Magnetic  
643 Resonance in Medicine 67 (2012) 1210–1224. doi:10.1002/mrm.23097.
- 644 O. Esteban, C. Markiewicz, R. W. Blair, C. Moodie, A. I. Isik, A. Erra-  
645 muzpe Aliaga, J. Kent, M. Goncalves, E. DuPre, M. Snyder, H. Oya,  
646 S. Ghosh, J. Wright, J. Durnez, R. A. Poldrack, K. J. Gorgolewski, fM-  
647 RIPrep: a robust preprocessing pipeline for functional MRI, Nature Meth-  
648 ods (2018a). doi:10.1038/s41592-018-0235-4.
- 649 O. Esteban, R. Blair, C. J. Markiewicz, S. L. Berleant, C. Moodie, F. Ma,  
650 A. I. Isik, A. Erramuzpe, K. J. D., M. Goncalves, E. DuPre, K. R. Sitek,

651 D. E. P. Gomez, D. J. Lurie, Z. Ye, R. A. Poldrack, K. J. Gorgolewski,  
652 fMRIPrep, Software (2018b). doi:10.5281/zenodo.852659.

653 K. Gorgolewski, C. D. Burns, C. Madison, D. Clark, Y. O. Halchenko, M. L.  
654 Waskom, S. Ghosh, Nipype: a flexible, lightweight and extensible neu-  
655 roimaging data processing framework in Python, *Frontiers in Neuroinfor-*  
656 *matics* 5 (2011) 13. doi:10.3389/fninf.2011.00013.

657 K. J. Gorgolewski, O. Esteban, C. J. Markiewicz, E. Ziegler, D. G. El-  
658 lis, M. P. Notter, D. Jarecka, H. Johnson, C. Burns, A. Manhães-  
659 Savio, C. Hamalainen, B. Yvernault, T. Salo, K. Jordan, M. Goncalves,  
660 M. Waskom, D. Clark, J. Wong, F. Loney, M. Modat, B. E. Dewey,  
661 C. Madison, M. di Oleggio Castello, M. G. Clark, M. Dayan, D. Clark,  
662 A. Keshavan, B. Pinsard, A. Gramfort, S. Berleant, D. M. Nielson,  
663 S. Bougacha, G. Varoquaux, B. Cipollini, R. Markello, A. Rokem,  
664 B. Moloney, Y. O. Halchenko, W. Demian, M. Hanke, C. Horea, J. Kacz-  
665 marzyk, G. de Hollander, E. DuPre, A. Gillman, D. Mordom, C. Buchanan,  
666 R. Tungaraza, W. M. Pauli, S. Iqbal, S. Sikka, M. Mancini, Y. Schwartz,  
667 I. B. Malone, M. Dubois, C. Frohlich, D. Welch, J. Forbes, J. Kent,  
668 A. Watanabe, C. Cumba, J. M. Huntenburg, E. Kastman, B. N. Nichols,  
669 A. Eshaghi, D. Ginsburg, A. Schaefer, B. Acland, S. Giavasis, J. Kleesiek,  
670 D. Erickson, R. Küttner, C. Haselgrove, C. Correa, A. Ghayoor, F. Liem,  
671 J. Millman, D. Haehn, J. Lai, D. Zhou, R. Blair, T. Glatard, M. Renfro,  
672 S. Liu, A. E. Kahn, F. Pérez-García, W. Triplett, L. Lampe, J. Stadler,  
673 X.-Z. Kong, M. Hallquist, A. Chetverikov, J. Salvatore, A. Park, R. A.  
674 Poldrack, R. C. Craddock, S. Inati, O. Hinds, G. Cooper, L. N. Perkins,

- 675 A. Marina, A. Mattfeld, M. Noel, L. Snoek, K. Matsubara, B. Che-  
676 ung, S. Rothmei, S. Urchs, J. Durnez, F. Mertz, D. Geisler, A. Flo-  
677 ren, S. Gerhard, P. Sharp, M. Molina-Romero, A. Weinstein, W. Brod-  
678 erick, V. Saase, S. K. Andberg, R. Harms, K. Schlamp, J. Arias, D. Pa-  
679 padopoulos Orfanos, C. Tarbert, A. Tambini, A. De La Vega, T. Nick-  
680 son, M. Brett, M. Falkiewicz, K. Podranski, J. Linkersdörfer, G. Flandin,  
681 E. Ort, D. Shachnev, D. McNamee, A. Davison, J. Varada, I. Schwabacher,  
682 J. Pellman, M. Perez-Guevara, R. Khanuja, N. Pannetier, C. McDermot-  
683 troe, S. Ghosh, Nipype, Software (2018). doi:10.5281/zenodo.596855.
- 684 N. J. Tustison, B. B. Avants, P. A. Cook, Y. Zheng, A. Egan, P. A. Yushke-  
685 vich, J. C. Gee, N4ITK: Improved N3 Bias Correction, *IEEE Transac-*  
686 *tions on Medical Imaging* 29 (2010) 1310–1320. doi:10.1109/TMI.2010.  
687 2046908.
- 688 B. B. Avants, C. L. Epstein, M. Grossman, J. C. Gee, Symmetric diffeo-  
689 morphic image registration with cross-correlation: Evaluating automated  
690 labeling of elderly and neurodegenerative brain, *Medical Image Analysis*  
691 12 (2008) 26–41. doi:10.1016/j.media.2007.06.004.
- 692 Y. Zhang, M. Brady, S. Smith, Segmentation of brain MR images through  
693 a hidden Markov random field model and the expectation-maximization  
694 algorithm, *IEEE Trans Med Imag* 20 (2001) 45–57.
- 695 M. Reuter, H. D. Rosas, B. Fischl, Highly accurate inverse consistent  
696 registration: A robust approach, *NeuroImage* 53 (2010) 1181–1196.  
697 doi:10.1016/j.neuroimage.2010.07.020.

- 698 A. M. Dale, B. Fischl, M. I. Sereno, Cortical Surface-Based Analysis: I.  
699 Segmentation and Surface Reconstruction, *NeuroImage* 9 (1999) 179–194.  
700 doi:10.1006/nimg.1998.0395.
- 701 A. Klein, S. S. Ghosh, F. S. Bao, J. Giard, Y. Häme, E. Stavsky, N. Lee,  
702 B. Rossa, M. Reuter, E. C. Neto, A. Keshavan, Mindboggling morphom-  
703 etry of human brains, *PLOS Computational Biology* 13 (2017) e1005350.  
704 doi:10.1371/journal.pcbi.1005350.
- 705 V. S. Fonov, A. C. Evans, R. C. McKinstry, C. R. Almli, D. L. Collins,  
706 Unbiased nonlinear average age-appropriate brain templates from birth  
707 to adulthood, *NeuroImage* 47, Supple (2009) S102. doi:10.1016/  
708 S1053-8119(09)70884-5.
- 709 D. N. Greve, B. Fischl, Accurate and robust brain image alignment using  
710 boundary-based registration, *NeuroImage* 48 (2009) 63–72. doi:10.1016/  
711 j.neuroimage.2009.06.060.
- 712 M. Jenkinson, P. Bannister, M. Brady, S. Smith, Improved Optimization for  
713 the Robust and Accurate Linear Registration and Motion Correction of  
714 Brain Images, *NeuroImage* 17 (2002) 825–841. doi:10.1006/nimg.2002.  
715 1132.
- 716 R. W. Cox, J. S. Hyde, Software tools for analysis and visualization of  
717 fMRI data, *NMR in Biomedicine* 10 (1997) 171–178. doi:10.1002/(SICI)  
718 1099-1492(199706/08)10:4/5<171::AID-NBM453>3.0.CO;2-L.
- 719 J. D. Power, A. Mitra, T. O. Laumann, A. Z. Snyder, B. L. Schlaggar, S. E.  
720 Petersen, Methods to detect, characterize, and remove motion artifact

721 in resting state fMRI, *NeuroImage* 84 (2014) 320–341. doi:10.1016/j.  
722 *neuroimage*.2013.08.048.

723 Y. Behzadi, K. Restom, J. Liau, T. T. Liu, A component based noise correc-  
724 tion method (CompCor) for BOLD and perfusion based fMRI, *NeuroImage*  
725 37 (2007) 90–101. doi:10.1016/j.*neuroimage*.2007.04.042.

726 T. D. Satterthwaite, M. A. Elliott, R. T. Gerraty, K. Ruparel, J. Loughhead,  
727 M. E. Calkins, S. B. Eickhoff, H. Hakonarson, R. C. Gur, R. E. Gur,  
728 D. H. Wolf, An improved framework for confound regression and filtering  
729 for control of motion artifact in the preprocessing of resting-state func-  
730 tional connectivity data, *NeuroImage* 64 (2013) 240–256. doi:10.1016/j.  
731 *neuroimage*.2012.08.052.

732 C. Lanczos, Evaluation of Noisy Data, *Journal of the Society for Industrial*  
733 *and Applied Mathematics Series B Numerical Analysis* 1 (1964) 76–85.  
734 doi:10.1137/0701007.

735 K. R. Sitek, O. Faruk Gulban, E. Calabrese, G. A. Johnson, S. S. Ghosh,  
736 F. De Martino, Mapping the human subcortical auditory system using  
737 histology, post mortem MRI and in vivo MRI at 7T, *eLife* (2019). doi:10.  
738 1101/568139.

739 A. Abraham, F. Pedregosa, M. Eickenberg, P. Gervais, A. Mueller, J. Kos-  
740 saifi, A. Gramfort, B. Thirion, G. Varoquaux, Machine learning for  
741 neuroimaging with scikit-learn, *Frontiers in Neuroinformatics* 8 (2014).  
742 doi:10.3389/fninf.2014.00014.

- 743 C. Cortes, M. Mohri, A. Rostamizadeh, Algorithms for learning kernels based  
744 on centered alignment, *Journal of Machine Learning Research* 13 (2012)  
745 795–828.
- 746 A. Gretton, O. Bousquet, A. Smola, B. Scikopf, Measuring statistical depen-  
747 dence with Hilbert-Schmidt norms, *Conference on Algorithmic Learning  
748 Theory* (2005) 63–77. doi:10.1007/11564089{\\_}7.
- 749 P. Robert, Y. Escoufier, A Unifying Tool for Linear Multivariate Statistical  
750 Methods: The RV- Coefficient, *Applied Statistics* 25 (1976).
- 751 L. Song, A. Smola, A. Gretton, K. M. Borgwardt, J. Bedo, Supervised fea-  
752 ture selection via dependence estimation, *ACM International Conference  
753 Proceeding Series* 227 (2007) 823–830. doi:10.1145/1273496.1273600.
- 754 W. McKinney, Data structures for statistical computing in python, in:  
755 *Proceedings of the 9th Python in Science Conference*, volume 445, Austin,  
756 TX, 2010, pp. 51–56.
- 757 W. McKinney, pandas: a foundational Python library for data analysis  
758 and statistics, *Python for High Performance and Scientific Computing* 14  
759 (2011).
- 760 X. Hu, L. Guo, J. Han, T. Liu, Decoding power-spectral profiles from fMRI  
761 brain activities during naturalistic auditory experience, *Brain Imaging and  
762 Behavior* 11 (2017) 253–263. doi:10.1007/s11682-016-9515-8.
- 763 J. V. Haxby, J. S. Guntupalli, A. C. Connolly, Y. O. Halchenko, B. R. Conroy,  
764 M. I. Gobbini, M. Hanke, P. J. Ramadge, A common, high-dimensional

765 model of the representation space in human ventral temporal cortex, Neu-  
766 ron 2 (2011).

767 T. Bazeille, E. Dupre, J.-b. Poline, B. Thirion, An empirical evaluation  
768 of functional alignment using inter-subject decoding, bioRxiv Preprints  
769 (2020) 1–16.

770 S. Recanatesi, M. Farrell, M. Advani, T. Moore, G. Lajoie, E. Shea-  
771 Brown, Dimensionality compression and expansion in Deep Neural Net-  
772 works (2019).

773 A. Ansuini, A. Laio, J. H. Macke, D. Zoccolan, Intrinsic dimension of data  
774 representations in deep neural networks, in: Advances in Neural Informa-  
775 tion Processing Systems, 2019.

776 L. Wyse, Audio Spectrogram Representations for Processing with Convolu-  
777 tional Neural Networks, in: Proceedings of the First International Work-  
778 shop on Deep Learning and Music joint with IJCNN, 2017, pp. 37–41.

779 A. v. d. Oord, S. Dieleman, H. Zen, K. Simonyan, O. Vinyals, A. Graves,  
780 N. Kalchbrenner, A. Senior, K. Kavukcuoglu, WaveNet: A Generative  
781 Model for Raw Audio, in: The 9th ISCA Speech Synthesis Workshop,  
782 2016.
